# Supplementary material for: Integrated proteomic and N-glycoproteomic analyses of doxorubicin sensitive and resistant ovarian cancer cells reveal glycoprotein alteration in protein abundance and glycosylation
Source: PubMed Central journal article supplement (PMC5355108; doi:10.18632/oncotarget.14542), 2017-01-06
Supplement: oncotarget-08-13413-s001.pdf [file oncotarget-08-13413-s001.pdf]

# Integrated proteomic and N-glycoproteomic analyses of doxorubicin sensitive and resistant ovarian cancer cells reveal glycoprotein alteration in protein abundance and glycosylation

## Supplementary Materials

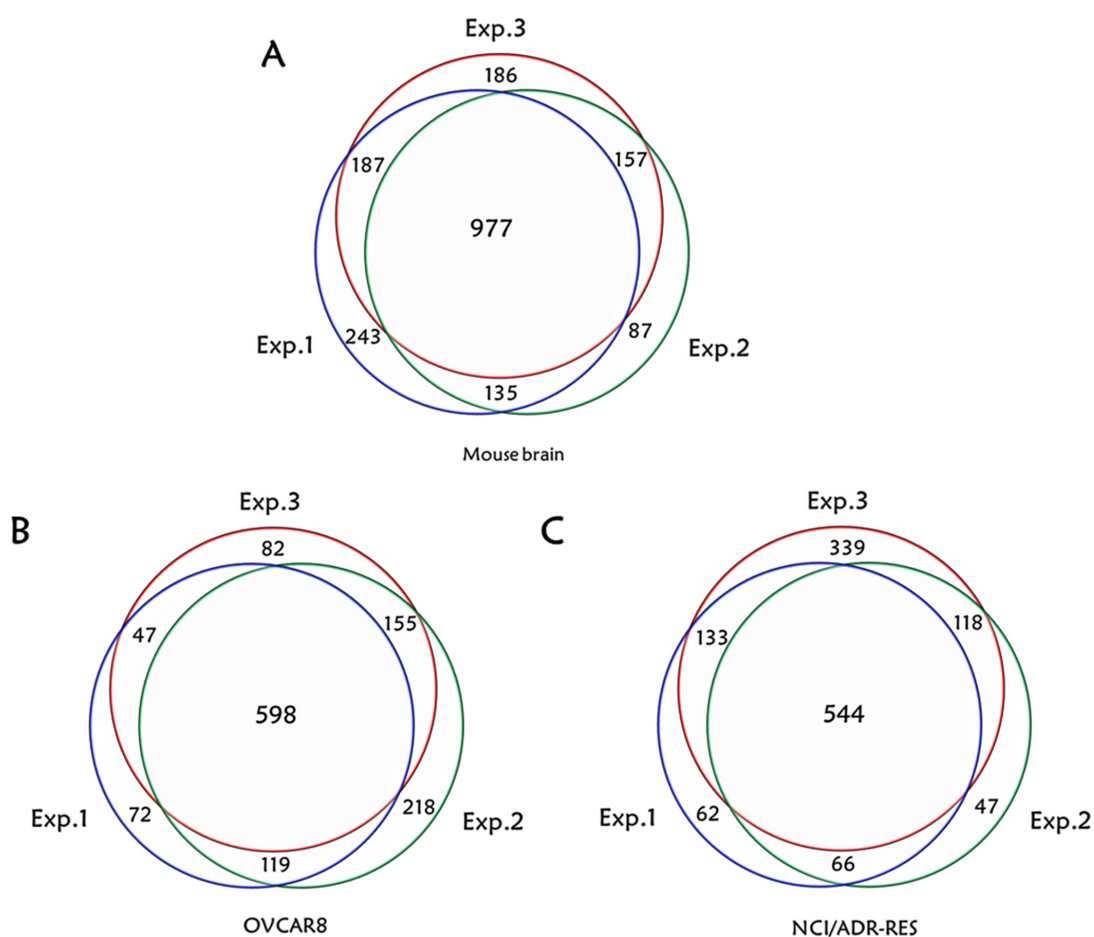

**Supplementary Figure 1: Venn diagrams.** (A) Overlap of the identification of the N-glycosylation sites in mouse brain in triplicates. (B) Overlap of the identification of the N-glycosylation sites in OVCAR8 cells. (C) Overlap of the identification of the N-glycosylation sites in NCI/ADR-RES cells.

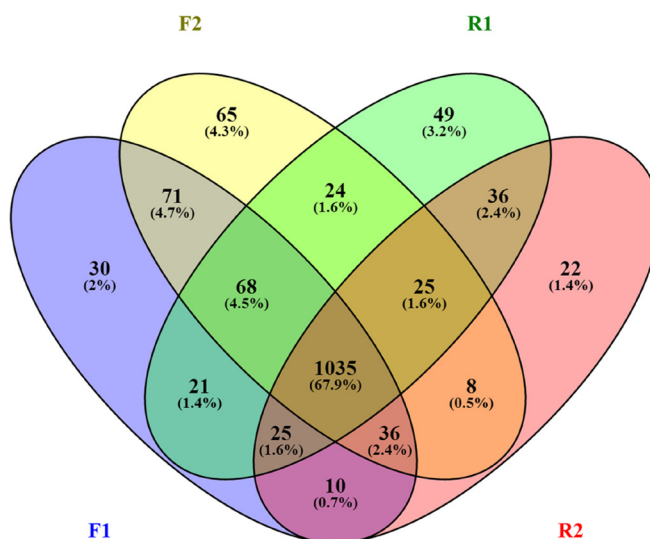

**Supplementary Figure 2: A summary of the number of N-glycosites identified from four independent N-glycoproteome experiments.** F1 and F2 results were obtained from two forward SILAC experiments, R1 and R2 results were from two reverse SILAC experiments.

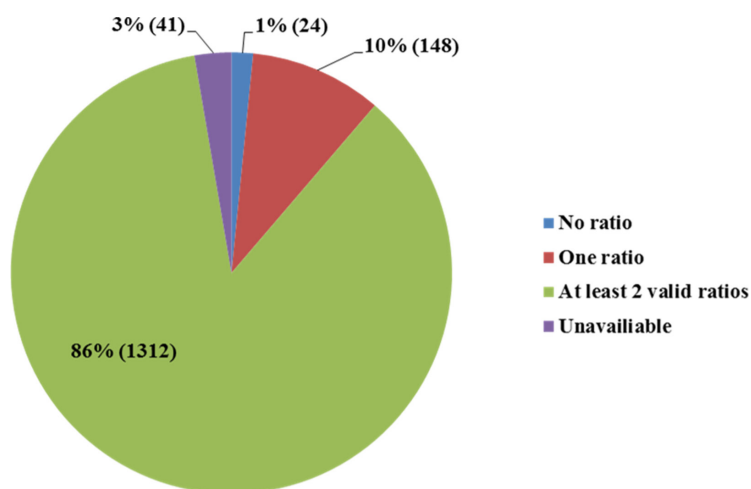

**Supplementary Figure 3: Annotation of identified N-glycoproteome (1525) based on the quantitative ratios.**

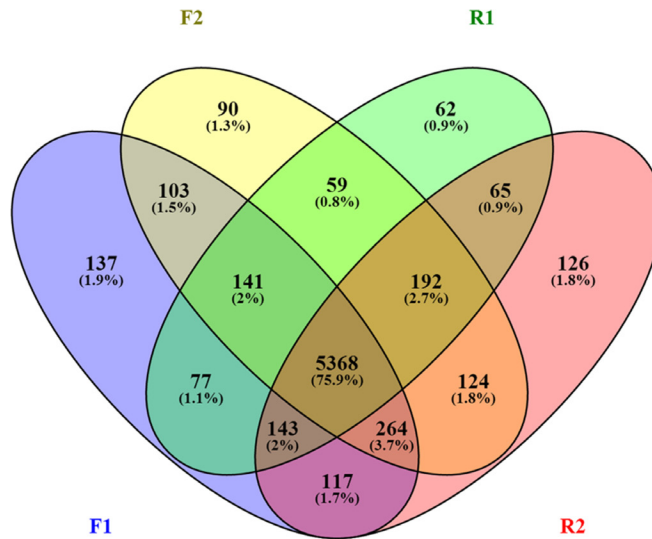

**Supplementary Figure 4: A summary of the number of proteins identified from four independent SILAC experiments.** F1 and F2 results were obtained from two forward SILAC experiments, R1 and R2 results were from two reverse SILAC experiments.

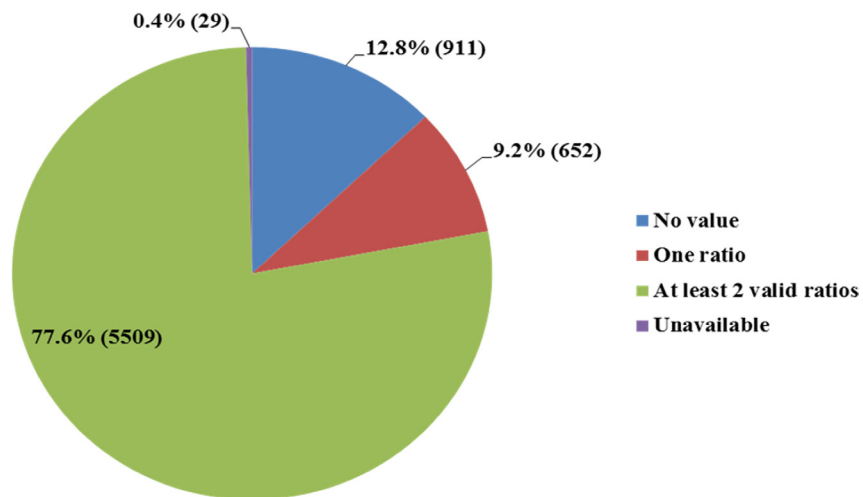

**Supplementary Figure 5: Annotation of identified proteome (7101) based on the quantitative ratios.**

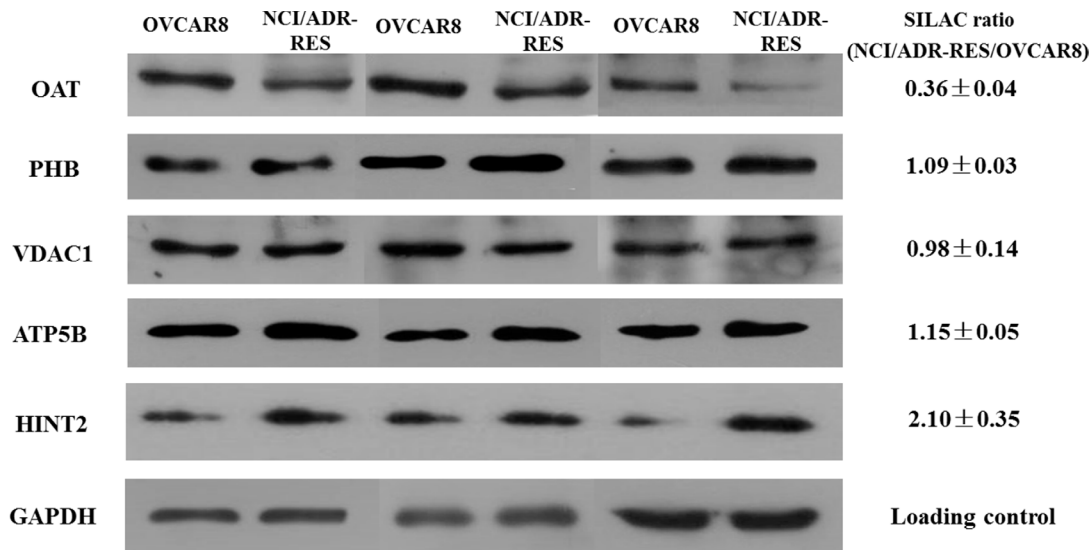

Supplementary Figure 6: Verification of SILAC results by western blotting.

**Supplementary Table 1: N-glycosites identified in three replicates in mouse brain.** See Supplementary\_Table\_1

**Supplementary Table 2: Data sets of HILIC enrichment specificity in three replicates in mouse brain.** See Supplementary\_Table\_2

**Supplementary Table 3: N-glycosites identified in three replicates in OVCAR8 cell and NCI/ADR-RES cells separately.** See Supplementary\_Table\_3

**Supplementary Table 4: Data sets of HILIC enrichment specificity in three replicates in OVCAR8 cell and NCI/ADR-RES cells separately.** See Supplementary\_Table\_4

**Supplementary Table 5A: N-glycosites identified in the N-glycoproteome of OVCAR8 and NCI/ADR-RES cells.** See Supplementary\_Table\_5A

**Supplementary Table 5B: High confidence N-glycosites identified in the N-glycoproteome of OVCAR8 and NCI/ADR-RES cells.** See Supplementary\_Table\_5B

**Supplementary Table 5C: High confidence N-glycosites quantified with at least two valid ratios in the N-glycoproteome of OVCAR8 and NCI/ADR-RES cells.** See Supplementary\_Table\_5C

**Supplementary Table 6: Potential false positive N-linked glycosylation sites identified by direct analysis of enriched glycopeptides by LC-MS/MS without PNGase F treatment.** See Supplementary\_Table\_6

**Supplementary Table 7A: Gene Ontology Analysis, data of an initial overview of the GO distribution provided by GOSlim Generic assignment.** See Supplementary\_Table\_7A

**Supplementary Table 7B: Gene Ontology Analysis, data of cellular components that are significantly overrepresented in the N-glycoproteome compared to the entire human proteome.** See Supplementary\_Table\_7B

**Supplementary Table 7C: Gene Ontology Analysis, data of molecular functions that are significantly overrepresented in the N-glycoproteome compared to the entire human proteome.** See Supplementary\_Table\_7C

**Supplementary Table 7D: Gene Ontology Analysis, data of biological processes that are significantly overrepresented in the N-glycoproteome compared to the entire human proteome.** See Supplementary\_Table\_7D

**Supplementary Table 8: Annotation of 253 significantly changed N-glycosite-containing peptides matching to UniProtKB database.** See Supplementary\_Table\_8

**Supplementary Table 9: Functional annotation of glycoproteins with significantly changed N-glycosite-containing peptides.** See Supplementary\_Table\_9

**Supplementary Table 10A: Protein groups with at least one unique peptide in per protein identified in the comparative proteome of OVCAR8 and NCI/ADR-RES cells.** See Supplementary\_Table\_10A

**Supplementary Table 10B: Protein groups quantified with at least two valid ratios in the comparative proteome of OVCAR8 and NCI/ADR-RES cells.** See Supplementary\_Table\_10B

**Supplementary Table 11A: Protein annotated as glycoproteins using Uniprot keywords in the comparative proteome of OVCAR8 and NCI/ADR-RES cells.** See Supplementary\_Table\_11A

**Supplementary Table 11B: Protein involved in glycan biosynthesis identified in the comparative proteome of OVCAR8 and NCI/ADR-RES cells.** See Supplementary\_Table\_11B

**Supplementary Table 12: 570 N-glycosite-containing peptides quantified and calibrated by corresponding protein ratio in SILAC labeling (NCI/ADR-RES:OVCAR8) experiment.** See Supplementary\_Table\_12
